# Supplementary material for: Effect of the Growth Interruption on the Surface Morphology and Crystalline Quality of MOCVD-Grown h-BN
Source: MDPI journal article supplement (doi:10.3390/cryst13030486), 2023-03-11
Supplement: s1 [file s1]

Archive with 1 entries (1 files):
- crystals-2263176-supplementary.pdf
