# Supplementary material for: Effect of the Growth Interruption on the Surface Morphology and Crystalline Quality of MOCVD-Grown h-BN
Source: MDPI journal article supplement (doi:10.3390/cryst13030486), 2023-03-11
Supplement: s1 [file s1 › crystals-2263176-supplementary.pdf]

## Effect of the growth interruption on the surface morphology and crystalline quality of MOCVD-grown h-BN

Qi Zhang <sup>1,2</sup>, Yanan Guo <sup>1,2,3,\*</sup>, Zhibin Liu <sup>1,2,3</sup>, Dadi Wang <sup>1,2</sup>, Qiang Li <sup>4</sup>, Jianchang Yan <sup>1,2,3,\*</sup>, Jinmin Li <sup>1,2,3</sup>, and Junxi Wang <sup>1,2,3,\*</sup>

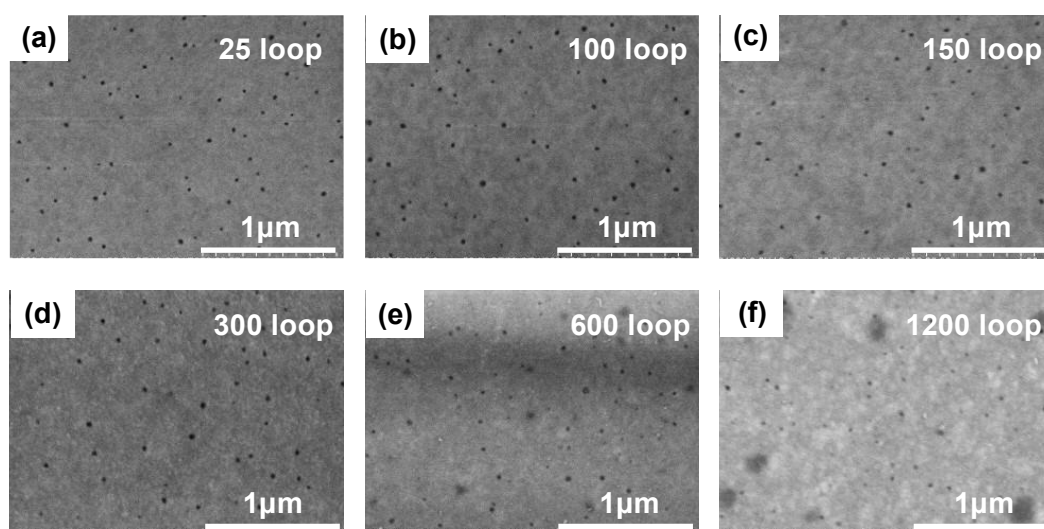

**Figure S1** The surface morphology variations of h-BN films grown by NH<sub>3</sub>/TEB with the growth loops.

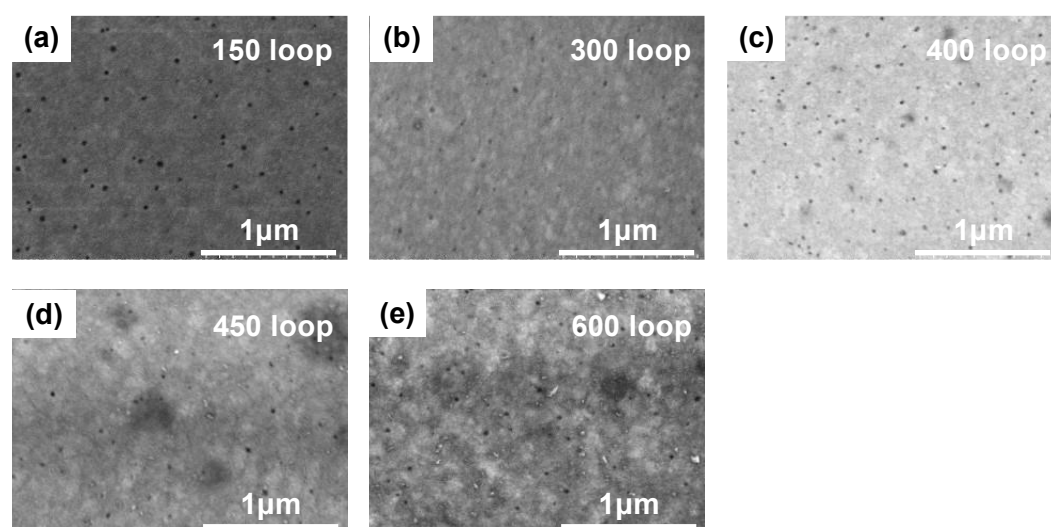

**Figure S2** The surface morphology variations of h-BN films grown by NH<sub>3</sub>/Itrp/TEB with the growth loops.

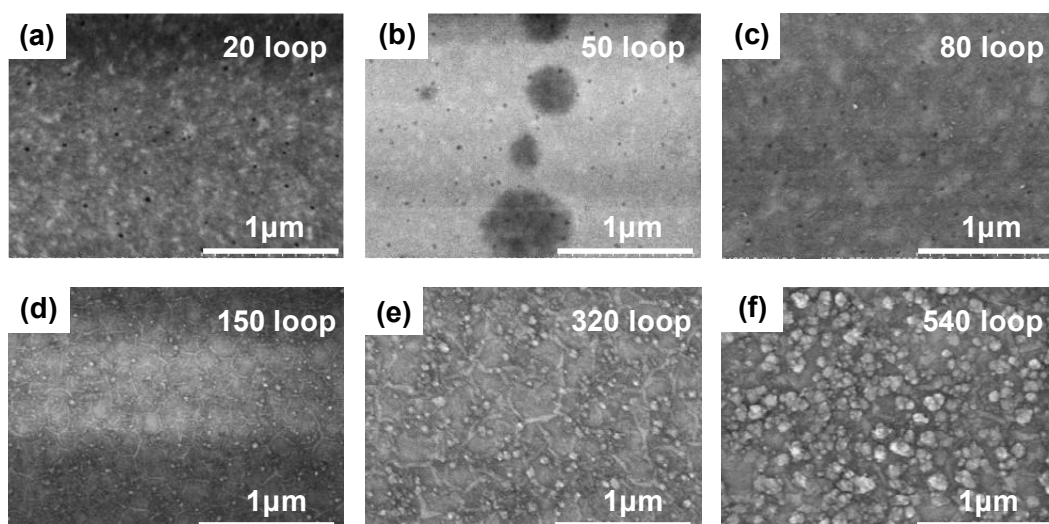

**Figure S3** The surface morphology variations of h-BN films grown by  $\text{NH}_3/\text{TEB}/\text{Itrp}$  with the growth loops.

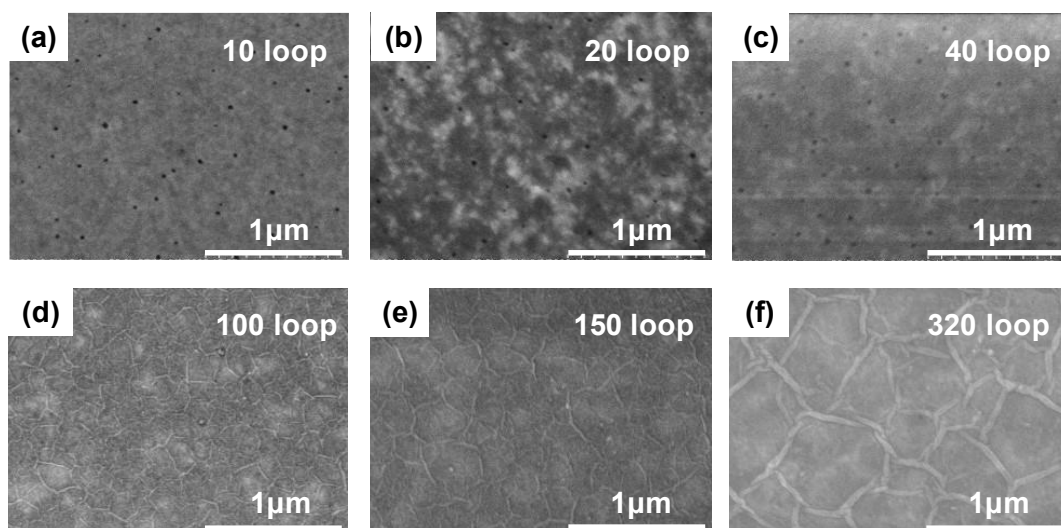

**Figure S4** The surface morphology variations of h-BN films grown by  $\text{NH}_3/\text{Itrp} / \text{TEB}/\text{Itrp}$  with the growth loops.

The HR XP spectra pertaining to Al for the four samples can be seen in figures 6(a)–(d). For the samples using the modes of  $\text{NH}_3/\text{TEB}$  and  $\text{NH}_3/\text{Itrp}/\text{TEB}$ , the peak comprises of two main peaks pertaining to Al-O and Al-N bonds: the Al-O bonds derived from the sapphire substrate signal and the Al-N bonds contributed by the nitrated sapphire. It implies that the BN films grown under  $\text{NH}_3/\text{TEB}$  and  $\text{NH}_3/\text{Itrp}/\text{TEB}$  modes are very thin. There was no substrate dependent Al signal detected due to the thick BN film by  $\text{NH}_3/\text{TEB}/\text{Itrp}$  and  $\text{NH}_3/\text{Itrp}/\text{TEB}/\text{Itrp}$  modes.

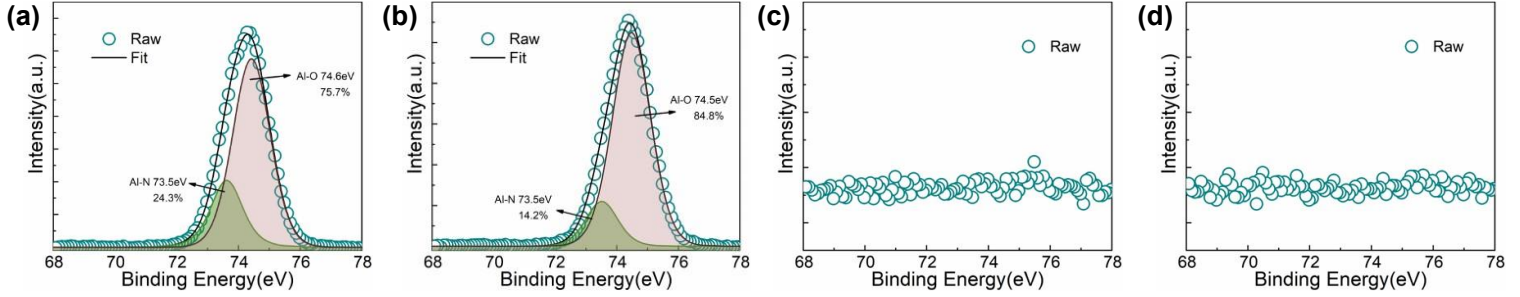

**Figure S5** The XPS spectra of Al 2p peak in h-BN film under four FME modes [41]. (a)  $\text{NH}_3/\text{TEB}$ , (b)  $\text{NH}_3/\text{Itrp}/\text{TEB}$ , (c)  $\text{NH}_3/\text{TEB}/\text{Itrp}$ , (d)  $\text{NH}_3/\text{Itrp}/\text{TEB}/\text{Itrp}$ .

As shown in Figure S7, the highly symmetric O 1s core-level spectra is observed for all samples. For the  $\text{NH}_3/\text{TEB}$  and  $\text{NH}_3/\text{Itrp}/\text{TEB}$  modes, the peak is the signal for O-Al bonds. This corresponds to the Al-O bonds in Al 2p. For the  $\text{NH}_3/\text{TEB}/\text{Itrp}$  and  $\text{NH}_3/\text{Itrp}/\text{TEB}/\text{Itrp}$  modes, the peak is assigned to O-B bonds. This corresponds to the B-O bonds in B 1s. It comes from the incorporation of O impurities due to the fast growth rate.

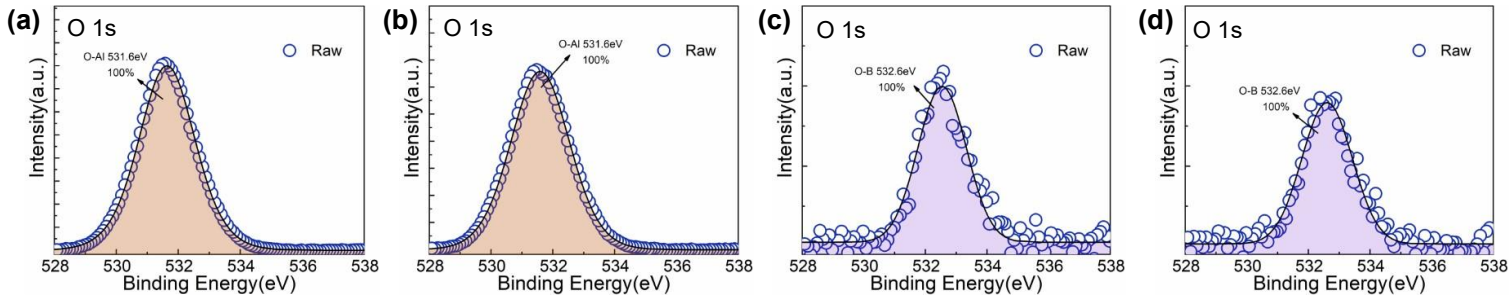

**Figure S6** The XPS spectra of O 1s peak in h-BN film under four FME modes [41,46]. (a)  $\text{NH}_3/\text{TEB}$ , (b)  $\text{NH}_3/\text{Itrp}/\text{TEB}$ , (c)  $\text{NH}_3/\text{TEB}/\text{Itrp}$ , (d)  $\text{NH}_3/\text{Itrp}/\text{TEB}/\text{Itrp}$ .

**Table S1.** The variations of binding energy, FWHM and percentage content of different bonds of B 1s, N 1s and C 1s XPS core level spectra in h-BN films by four FME modes.

| B-N                            |              |          |      | B-O          |          |      | B-C          |          |      |
|--------------------------------|--------------|----------|------|--------------|----------|------|--------------|----------|------|
|                                | Position(eV) | FWHM(eV) | B-N% | Position(eV) | FWHM(eV) | B-O% | Position(eV) | FWHM(eV) | B-C% |
| 150loop                        |              |          |      |              |          |      |              |          |      |
| NH <sub>3</sub> /TEB           | 190.64       | 1.15     | 100  | /            | /        | 0    | /            | /        | 0    |
| NH <sub>3</sub> /Itrp/TEB      | 190.68       | 1.17     | 100  | /            | /        | 0    | /            | /        | 0    |
| NH <sub>3</sub> /TEB/Itrp      | 190.43       | 0.97     | 76.0 | 191.10       | 0.97     | 20.6 | 189.39       | 0.87     | 3.4  |
| NH <sub>3</sub> /Itrp/TEB/Itrp | 190.50       | 1.04     | 75.2 | 191.29       | 1.00     | 12.1 | 189.69       | 1.09     | 12.7 |

  

| N-B                            |              |          |      | N-Al         |          |       | N-O          |          |      |
|--------------------------------|--------------|----------|------|--------------|----------|-------|--------------|----------|------|
|                                | Position(eV) | FWHM(eV) | N-B% | Position(eV) | FWHM(eV) | N-Al% | Position(eV) | FWHM(eV) | N-O% |
| 150loop                        |              |          |      |              |          |       |              |          |      |
| NH <sub>3</sub> /TEB           | 398.32       | 1.20     | 65.1 | 397.17       | 1.24     | 34.9  | /            | /        | 0    |
| NH <sub>3</sub> /Itrp/TEB      | 398.25       | 1.24     | 81.7 | 369.98       | 1.19     | 14.9  | 400.11       | 1.43     | 3.4  |
| NH <sub>3</sub> /TEB/Itrp      | 398.20       | 1.19     | 100  | /            | /        | 0     | /            | /        | 0    |
| NH <sub>3</sub> /Itrp/TEB/Itrp | 398.16       | 1.19     | 100  | /            | /        | 0     | /            | /        | 0    |

  

| C-C                            |              |          |      | C-B          |          |      | C-N          |          |      |
|--------------------------------|--------------|----------|------|--------------|----------|------|--------------|----------|------|
|                                | Position(eV) | FWHM(eV) | C-C% | Position(eV) | FWHM(eV) | C-B% | Position(eV) | FWHM(eV) | C-N% |
| 150loop                        |              |          |      |              |          |      |              |          |      |
| NH <sub>3</sub> /TEB           | 284.8        | 1.20     | 81.1 | /            | /        | 0    | 286.17       | 1.52     | 9.5  |
| NH <sub>3</sub> /Itrp/TEB      | 284.8        | 1.18     | 82.1 | /            | /        | 0    | 286.00       | 1.86     | 9.4  |
| NH <sub>3</sub> /TEB/Itrp      | 284.8        | 1.18     | 84.5 | 282.57       | 1.45     | 5.8  | 286.31       | 1.94     | 9.7  |
| NH <sub>3</sub> /Itrp/TEB/Itrp | 284.8        | 1.28     | 79.2 | 282.47       | 1.28     | 12.7 | 286.58       | 1.30     | 8.2  |
